# Supplementary material for: Cephalotaxine Inhibits the Survival of Leukemia Cells by Activating Mitochondrial Apoptosis Pathway and Inhibiting Autophagy Flow
Source: MDPI journal article supplement (doi:10.3390/molecules26102996), 2021-05-18

## Supplementary Materials

**A**

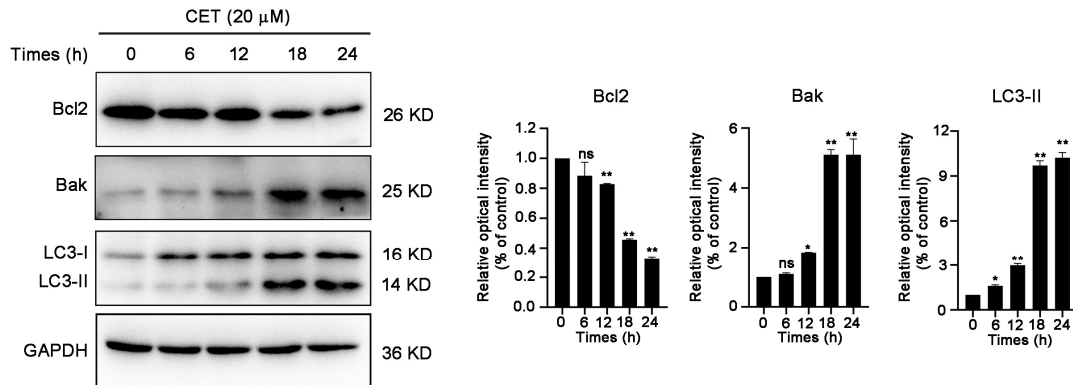

**Figure 1.** The expression levels of Bcl2, Bak and LC3-II were determined by Western blot. HL-60 cells were treated with 20  $\mu$ M CET for indicated time. Data are presented as the mean  $\pm$  SD. \* $p$  < 0.05 and \*\* $p$  < 0.01 versus control group.

**A**

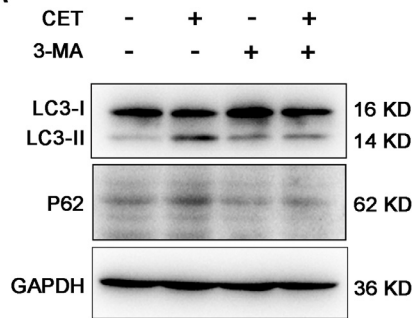

**B**

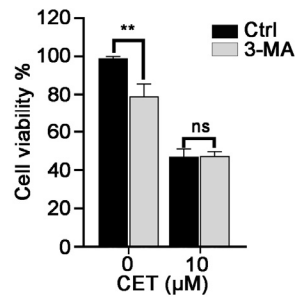

**Figure 2.** (A) In the absence or existence of 3-MA (2 mM), HL-60 cells were treated with CET (10  $\mu$ M) for 24 h. LC3-II and p62 was measured by Western blotting. (B) Cell viability was determined by the CCK-8 assay. \*\* $p$  < 0.01.

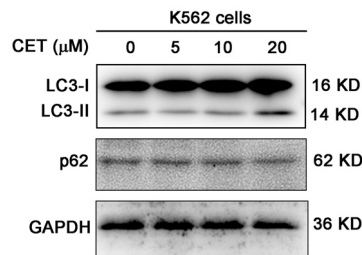

**Figure 3.** The expression levels of LC3-II and p62 were determined by Western blot. K562 cells were treated with CET treatment (5, 10, 20  $\mu$ M) for 24 h.

Original Images for Western Blot's

**Figure 2C**

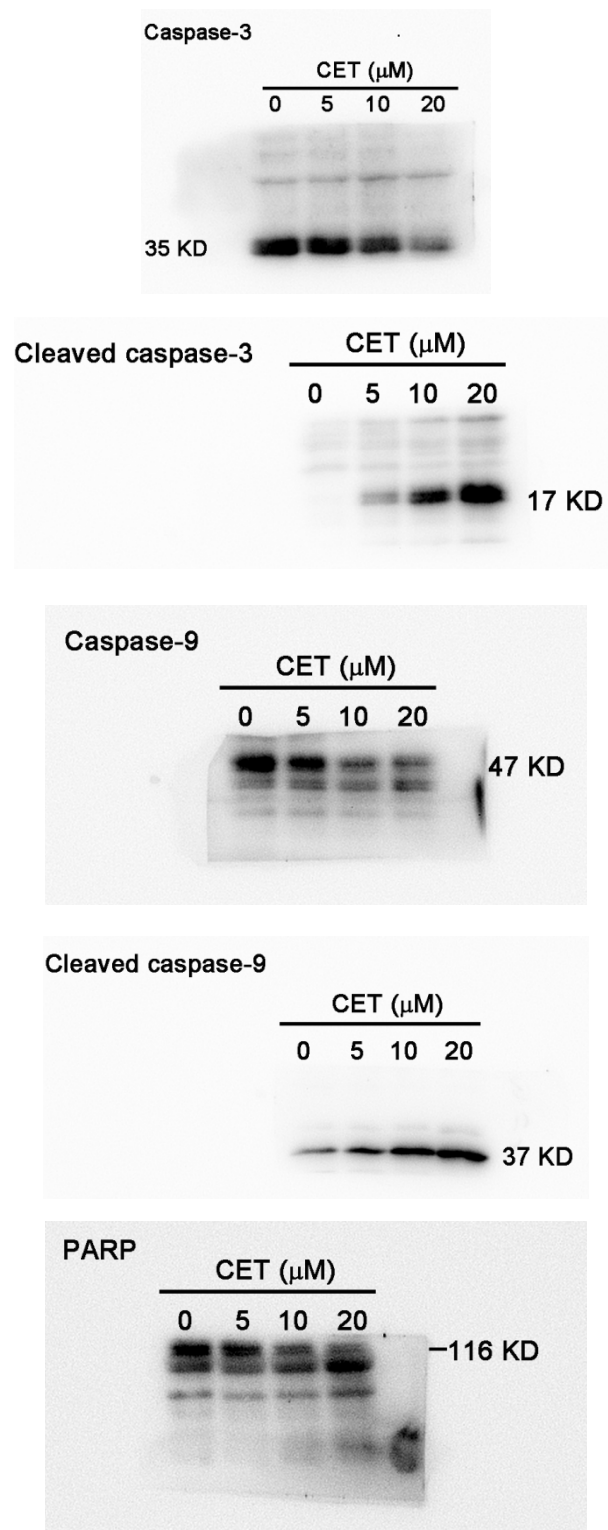

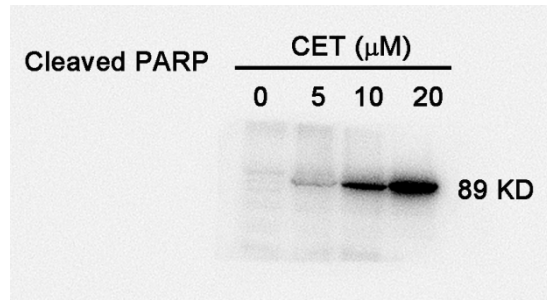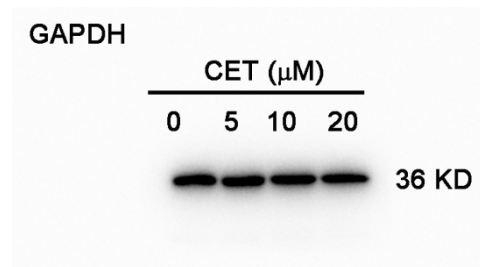

**Figure 2D**

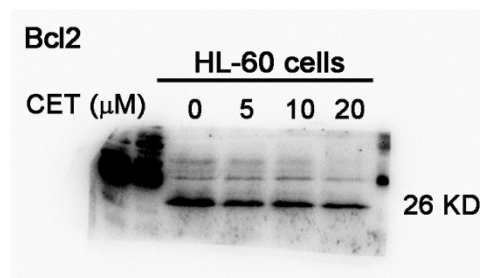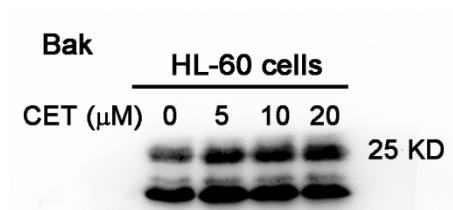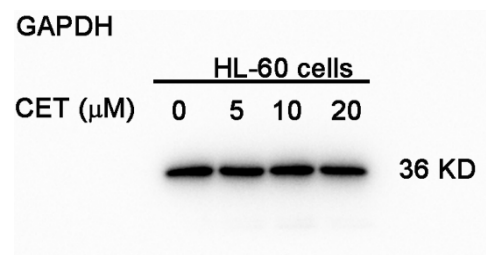

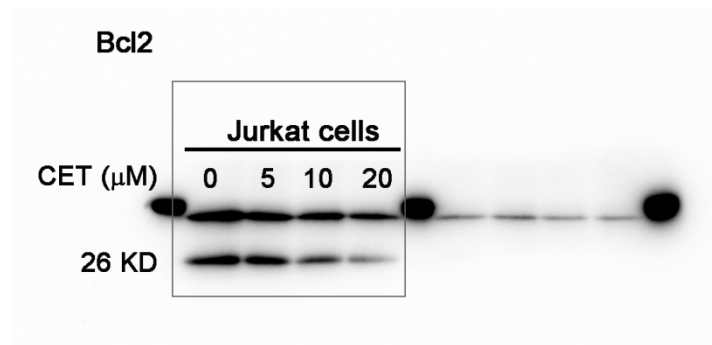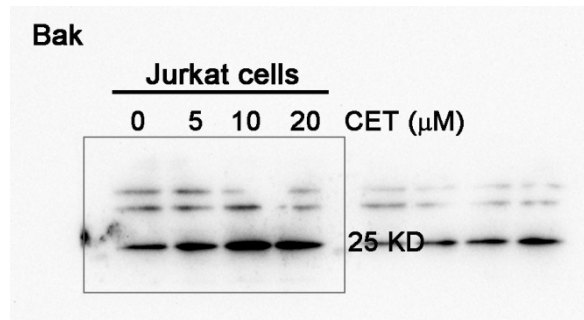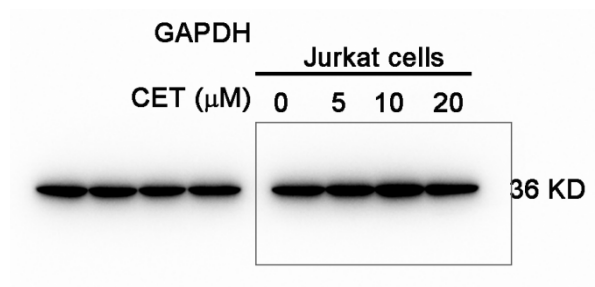

**Figure 4E**

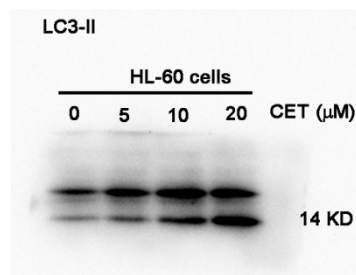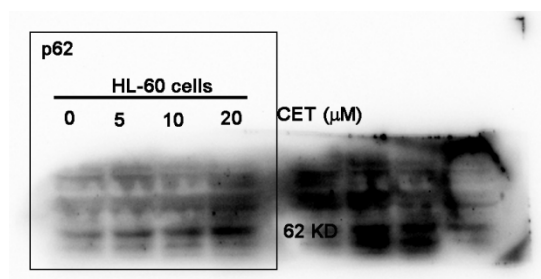

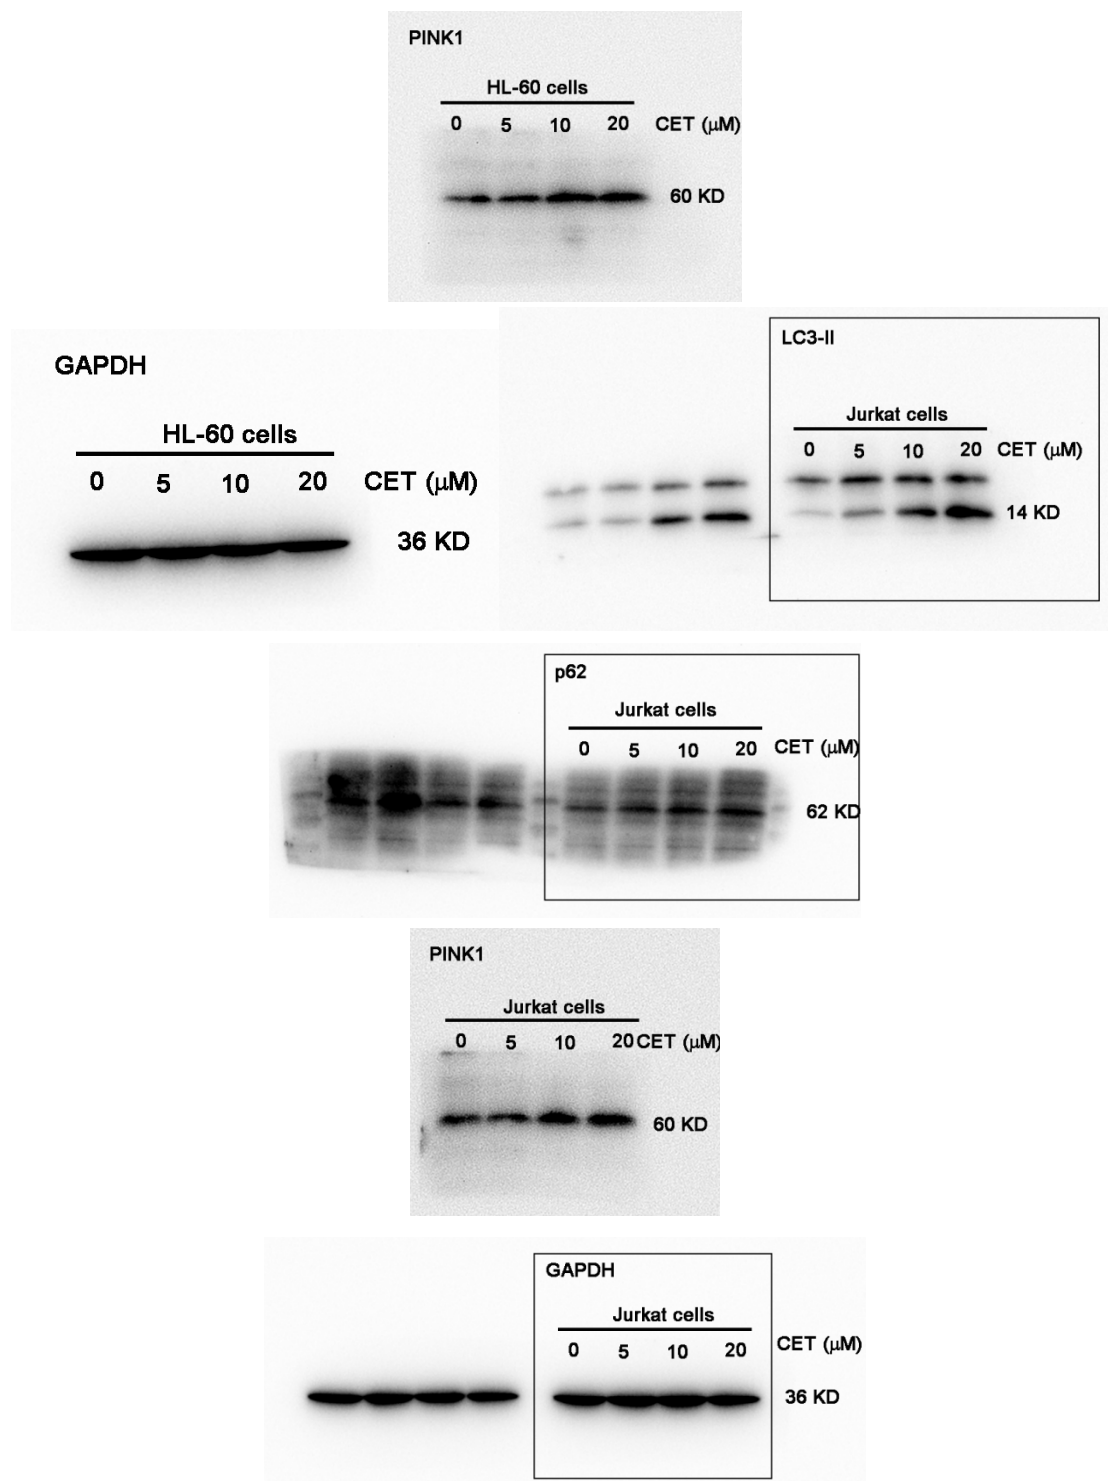

**Figure 5A**

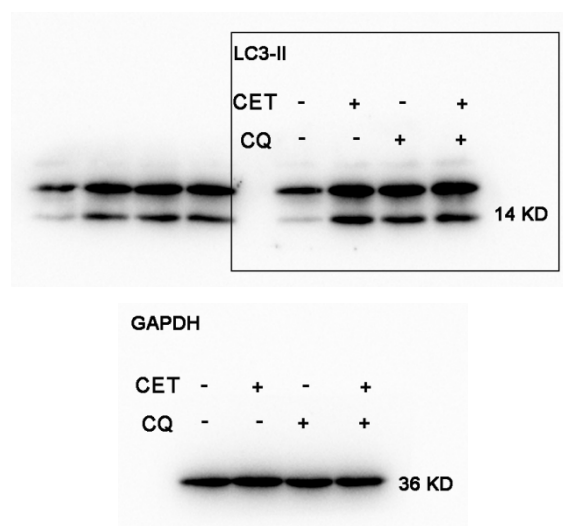

**Figure 5B**

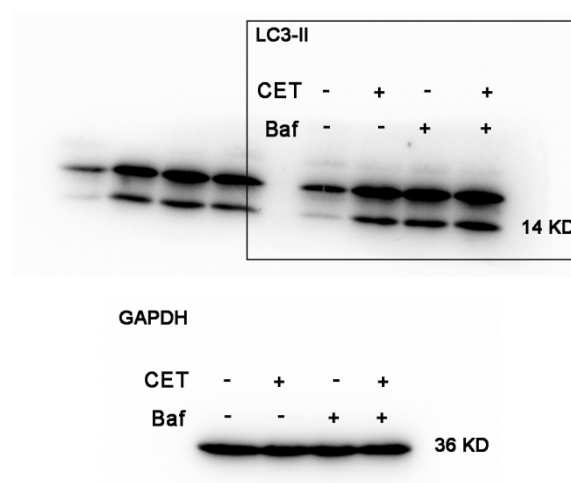

**Figure 5C**

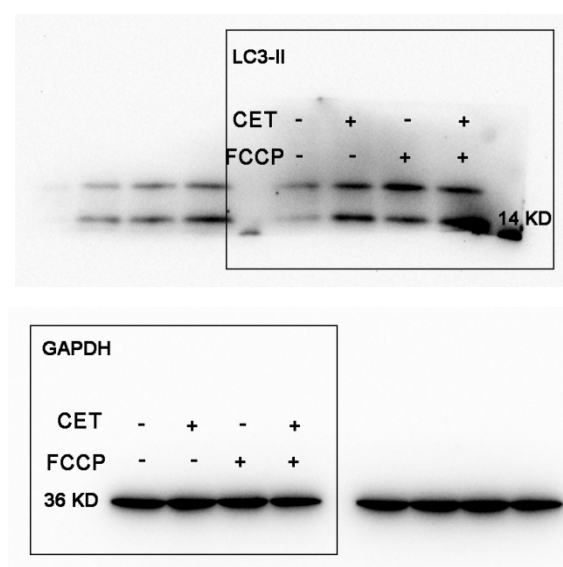

Supplementary materials

Figure S1

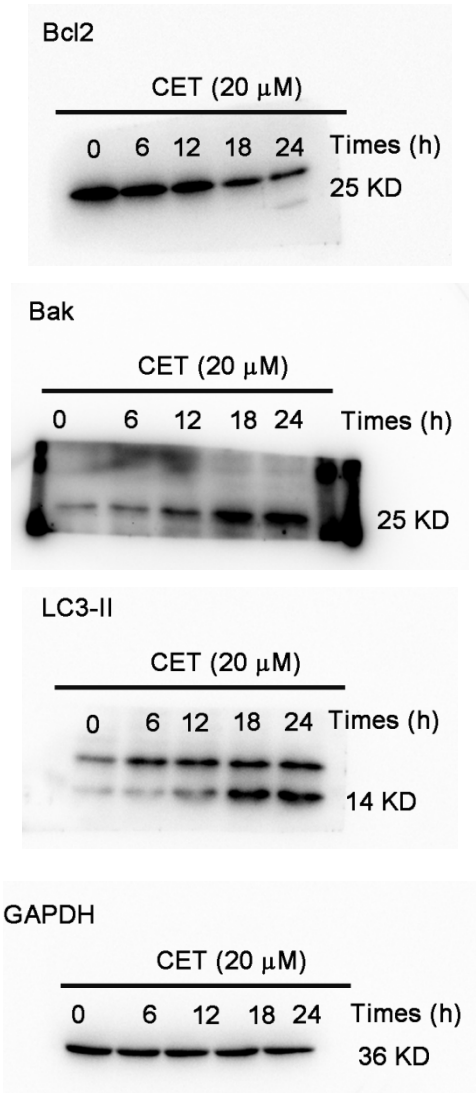

Figure S2

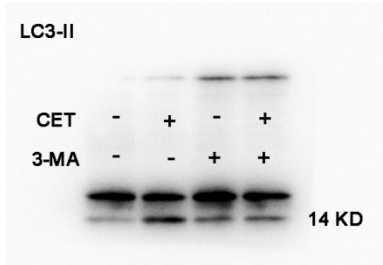

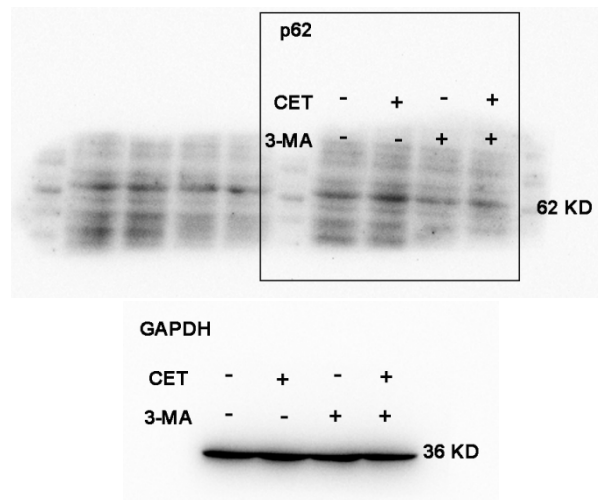

**Figure S3**

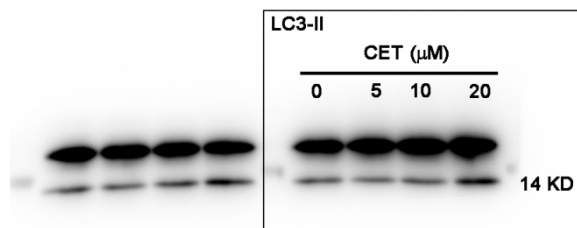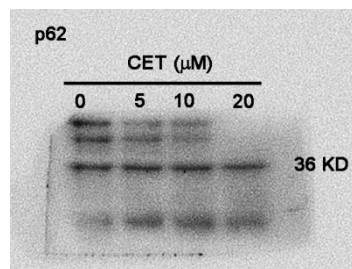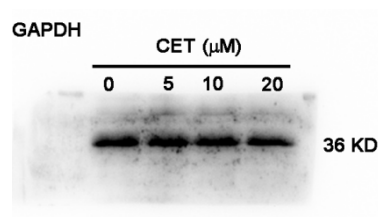

Supplement: s1 [file s1]
